# Supplementary material for: Inter-membrane association of the Sec and BAM translocons for bacterial outer-membrane biogenesis
Source: eLife journal article supplement (doi:10.7554/elife.60669), 2020-11-04

BAM:HTL negative stain

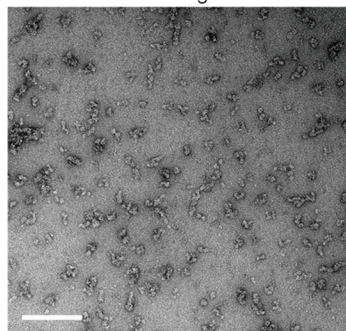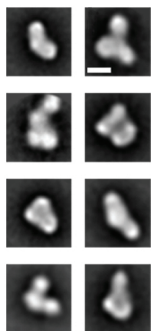

BAM:HTL cryo

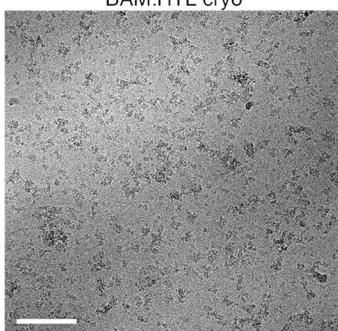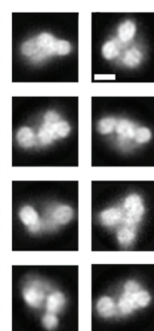**Set I**

357,347 particles

↓ 2x 2D classif.

293,541 particles

**Set II**

482,498 particles

↓ 2x 2D classif.

314,952 particles

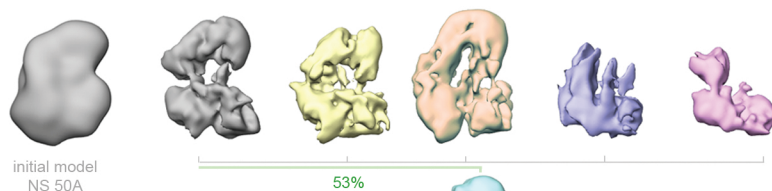

53%

3x 3D  
classif.3D auto-refine  
97,553 particles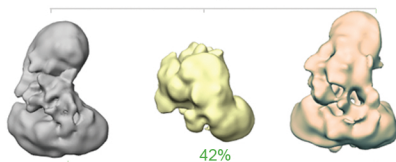

42%

Projection Matching  
41,652 particlesinitial model  
to SetII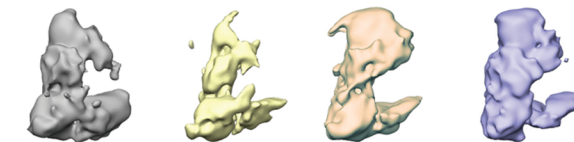

42%

3x 3D  
classif.3D auto-refine  
55,147 particles

77%

96,799 particles

reference model

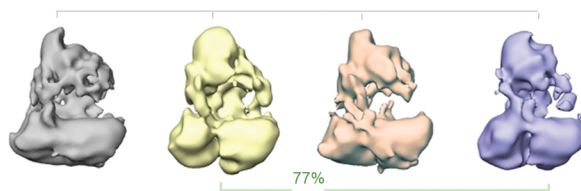

77%

2x 3D  
classif.3D auto-refine  
74,222 particlesCylindrical  
mask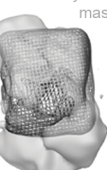

back view

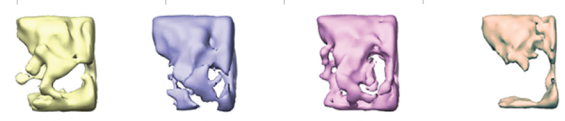

44%

3D auto-refine  
29,245 particles3x 3D  
classif.

Top mask

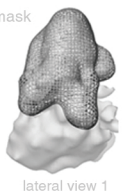

lateral view 1

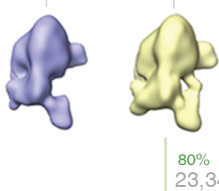

80%

23,346 particles

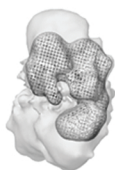

lateral view 2

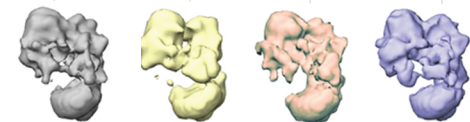

86%

2x 3D  
classif  
(no mask)

12,779 particles

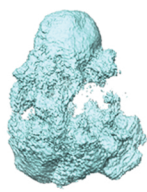3D auto-refine  
27 Å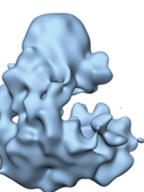Post-processing  
27 Å

3D classification

8,448 particles

Projection Matching

3D auto-refine

16,86 Å

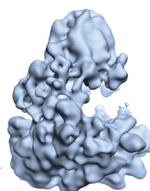Post-processing  
18,23 Å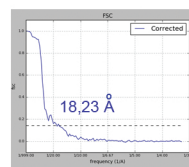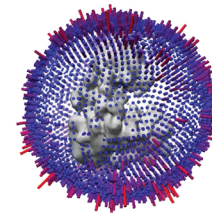

Supplement: supp [file elife-60669-supp-v1.zip]
