# Supplementary material for: Inter-membrane association of the Sec and BAM translocons for bacterial outer-membrane biogenesis
Source: eLife. 2020 Nov 4;9:e60669. doi: 10.7554/eLife.60669 (PMC7695460; doi:10.7554/eLife.60669)
Supplement: Figure 2—figure supplement 3—source data 1. — Analysis of the protein composition of the HTL-BAM preparations in detergent solution by MS. Only proteins of interest are shown in this table. The SDS-PAGE bands corresponding to the GraFix fractions used for negative stain-EM processing (e.g. Figure 2—figure supplement 3a, middle and right, asterisk) were cut from the gel and prepared for protein digestion, extraction, and MS. [file elife-60669-fig2-figsupp3-data1.xls]

## Sheet: Sheet1
Table 1: Mass spectometry analysis of the GraFix fractions for image processing
Sample		Accession	Description	Score	Coverage	# Proteins	# Peptides	# PSMs	Area
		B7UJN1	Protein translocase subunit SecD OS=Escherichia coli O127:H6 (strain E2348/69 / EPEC) OX=574521 GN=secD PE=3 SV=1 - [B7UJN1_ECO27]	1166.56	53.01	1	35	403	4.60892e+08
		B7UIM2	Outer membrane protein assembly factor BamA OS=Escherichia coli O127:H6 (strain E2348/69 / EPEC) OX=574521 GN=bamA PE=3 SV=1 - [BAMA_ECO27]	683.993	60.74	1	46	257	7.4996e+07
		B7UGM7	Outer membrane protein assembly factor BamC OS=Escherichia coli O127:H6 (strain E2348/69 / EPEC) OX=574521 GN=nlpB PE=3 SV=1 - [B7UGM7_ECO27]	404.015	55.81	1	14	119	3.64237e+07
BAM:HTL detergent		B7UJN2	Protein-export membrane protein SecF OS=Escherichia coli O127:H6 (strain E2348/69 / EPEC) OX=574521 GN=secF PE=3 SV=1 - [B7UJN2_ECO27]	249.638	27.55	1	7	74	2.7724e+07
		B7UMH2	Membrane protein insertase YidC OS=Escherichia coli O127:H6 (strain E2348/69 / EPEC) OX=574521 GN=yidC PE=3 SV=1 - [YIDC_ECO27]	181.059	36.31	1	13	64	3.98267e+07
		B7UH30	Outer membrane protein assembly factor BamD OS=Escherichia coli O127:H6 (strain E2348/69 / EPEC) OX=574521 GN=yfiO PE=3 SV=1 - [B7UH30_ECO27]	173.399	66.12	1	15	76	3.23495e+07
		B7UGV8	Outer membrane protein assembly factor BamB OS=Escherichia coli O127:H6 (strain E2348/69 / EPEC) OX=574521 GN=yfgL PE=3 SV=1 - [B7UGV8_ECO27]	129.355	34.44	1	11	45	3.1432e+07
		B7UK24	Protein translocase subunit SecY OS=Escherichia coli O127:H6 (strain E2348/69 / EPEC) OX=574521 GN=secY PE=3 SV=1 - [B7UK24_ECO27]	36.4272	15.58	1	5	14	3.4535e+06
