# Supplementary figures and images for: Inter-membrane association of the Sec and BAM translocons for bacterial outer-membrane biogenesis
Source: eLife journal article supplement (doi:10.7554/elife.60669), 2020-11-04

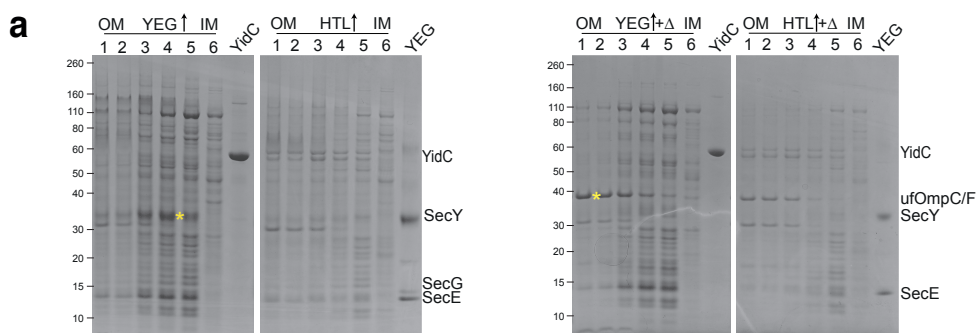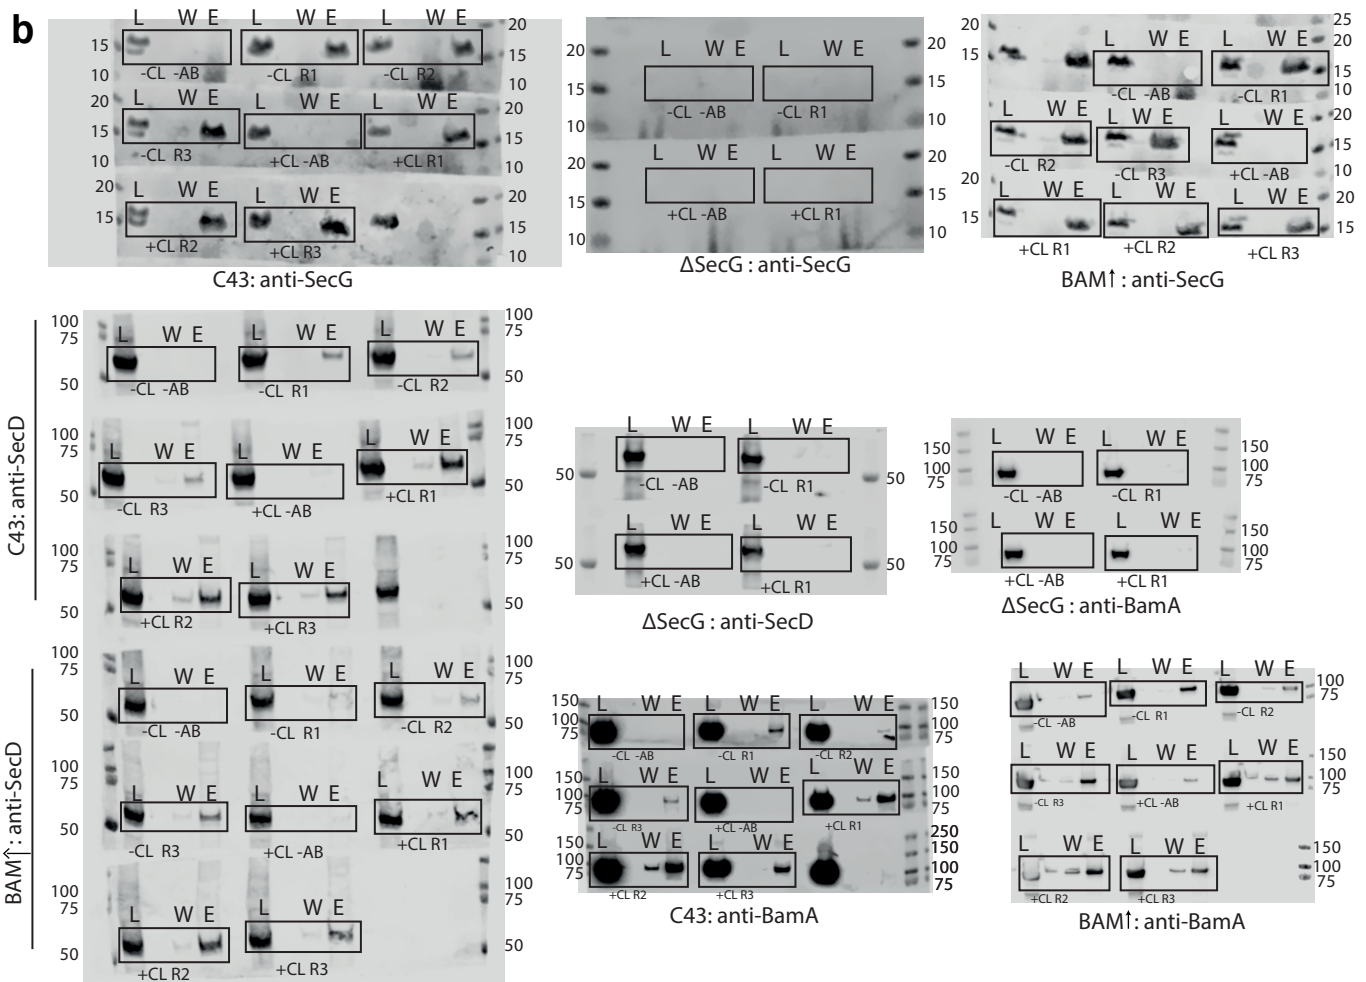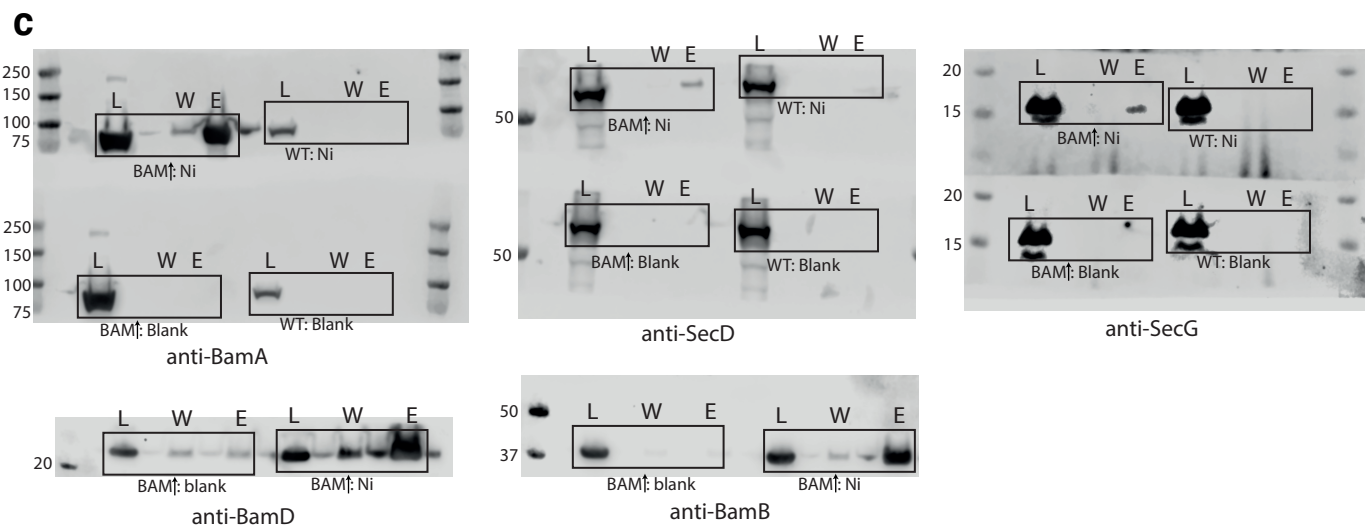

Supplement: supp [file elife-60669-supp-v1.zip]

HTL-DDM - CL

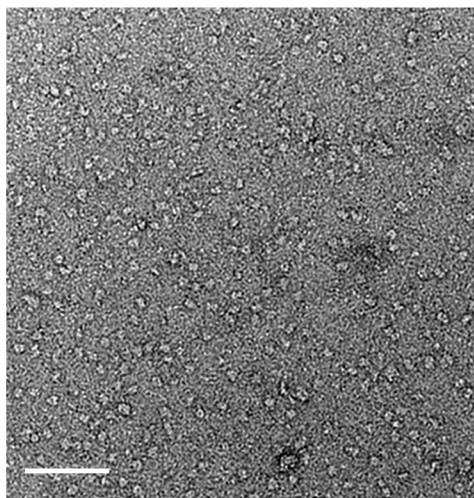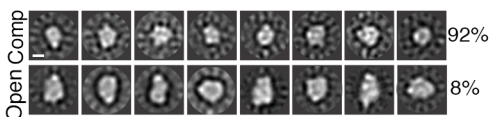

HTL-DDM + CL

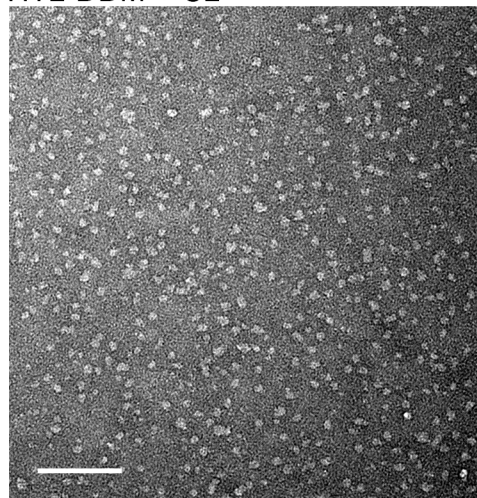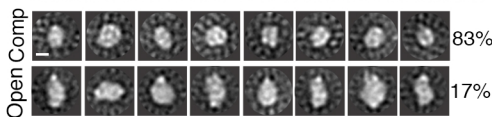

HTL-DDM glycerol gradient + CL

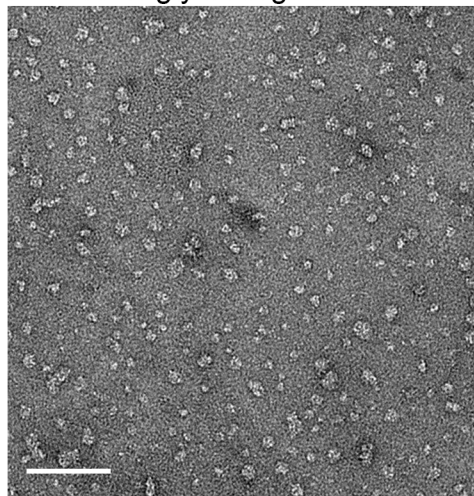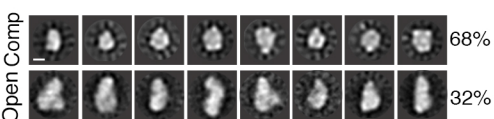

HTL-DDM GraFix + CL

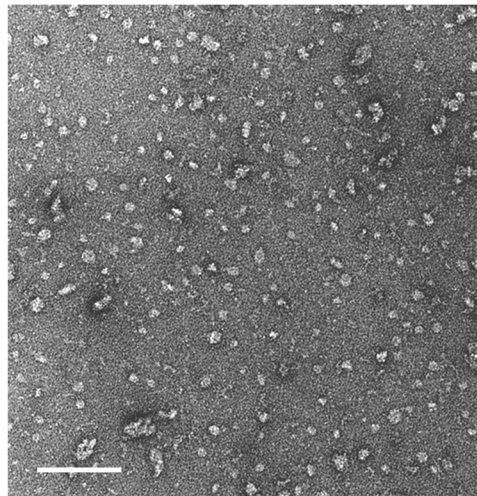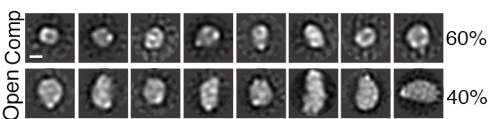

Supplement: supp [file elife-60669-supp-v1.zip]

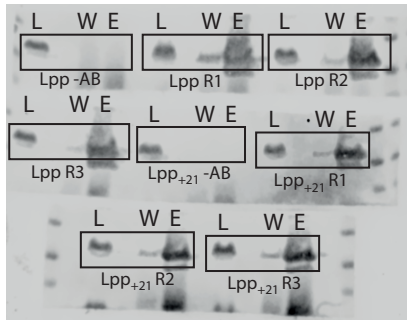

anti SecG

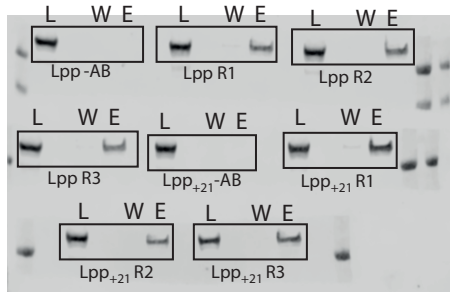

anti SecD

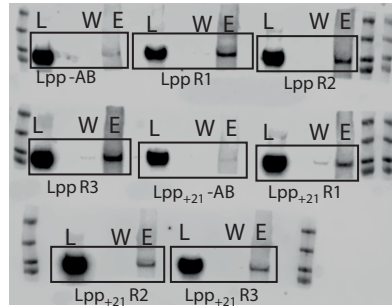

anti BamA

Supplement: supp [file elife-60669-supp-v1.zip]

HTL-DDM + CL

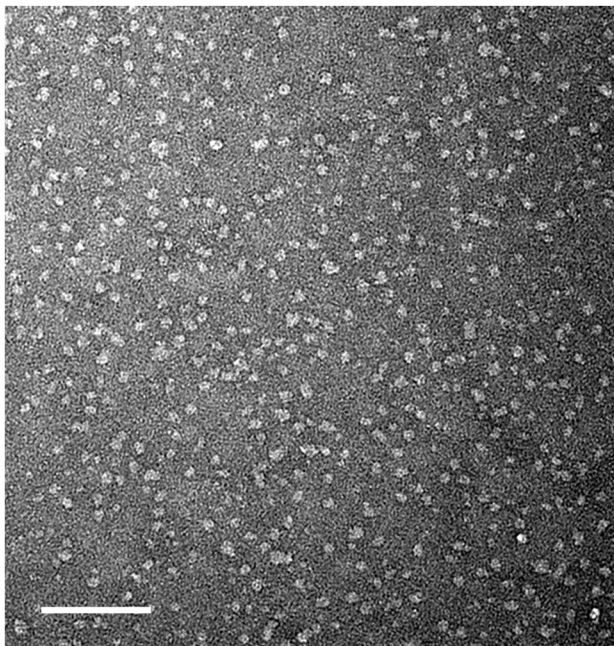

Open Comp

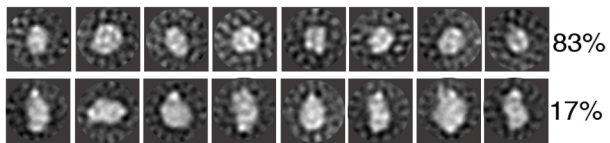

HTL519-DDM + CL

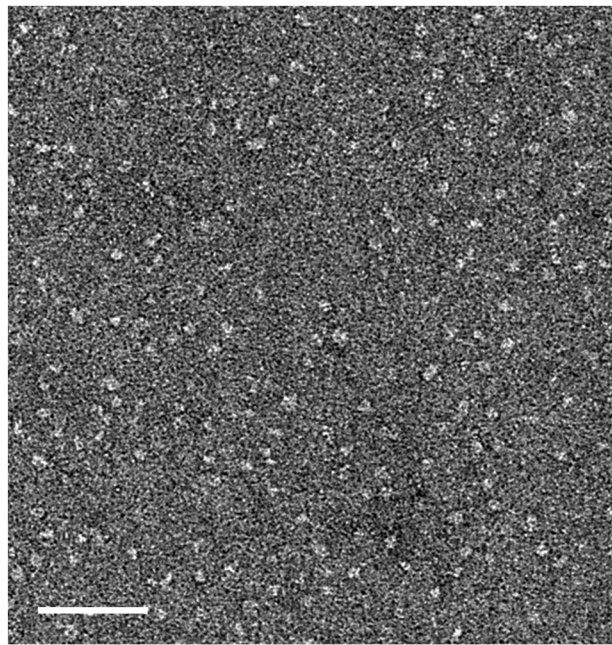

Open Comp

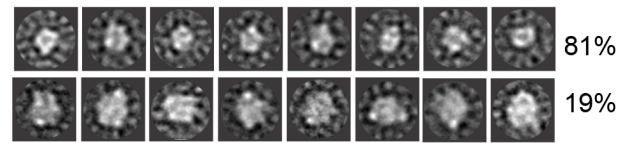

Supplement: supp [file elife-60669-supp-v1.zip]

a

HTL:BAM glycerol gradient + CL

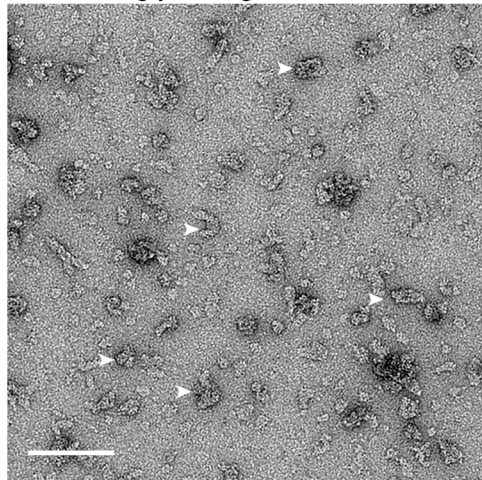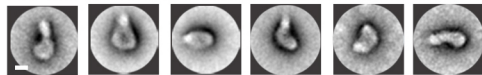

b

HTL:BAM GraFix + CL

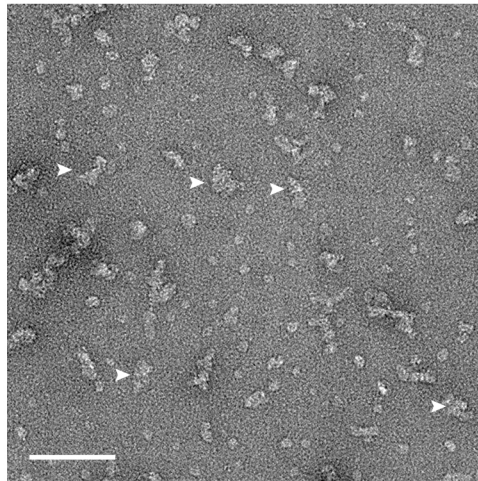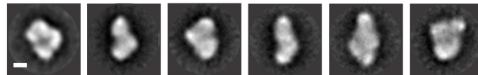

c

HTL:BAM GraFix no cardiolipin

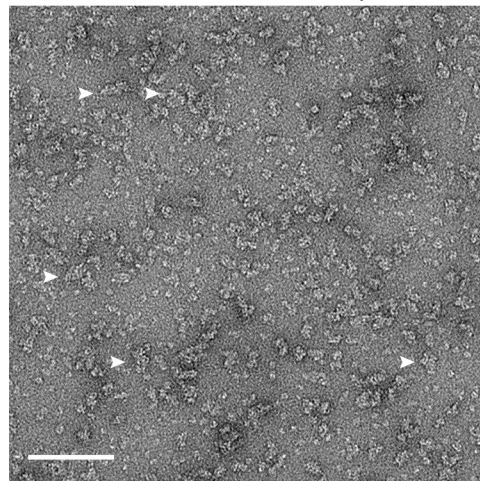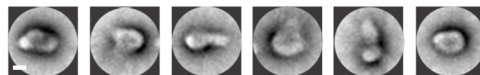

Supplement: supp [file elife-60669-supp-v1.zip]

**a**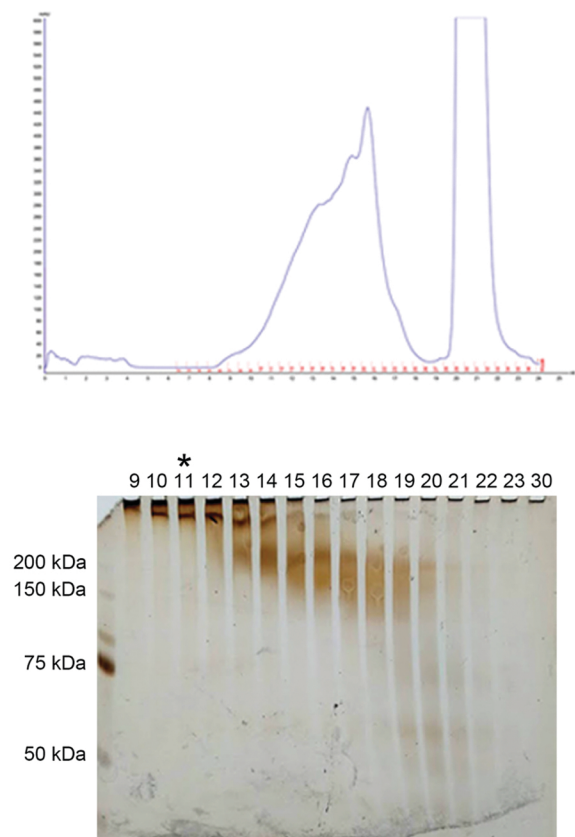**b**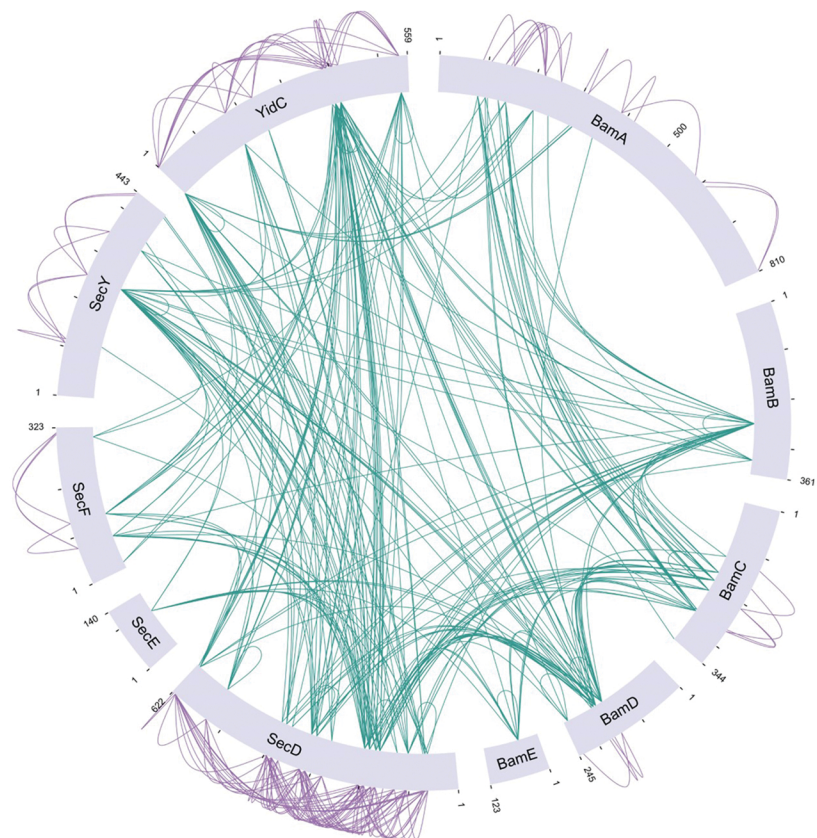**c**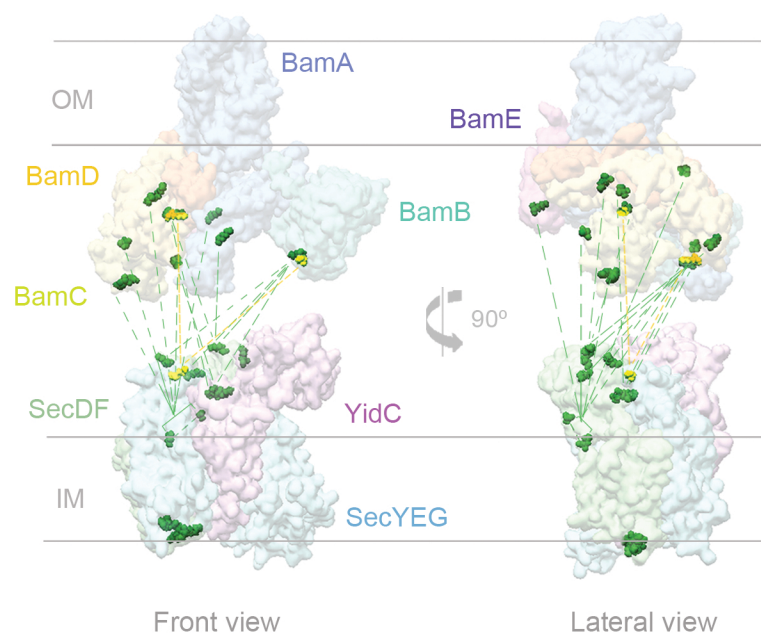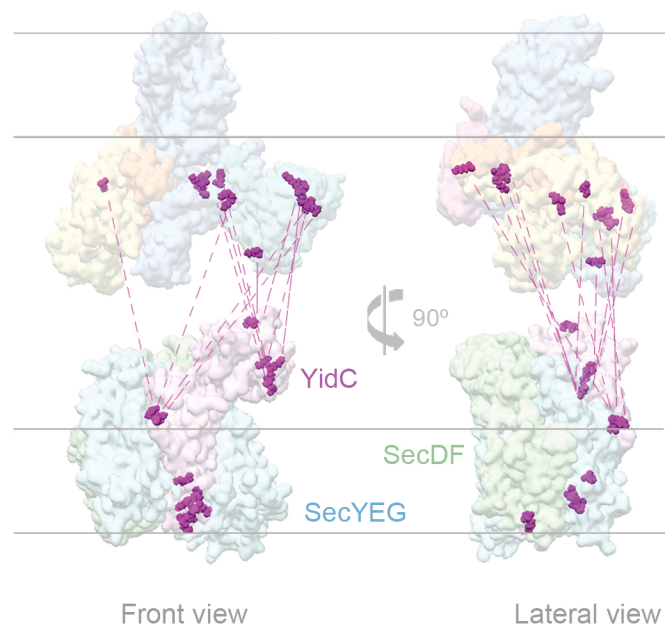

Supplement: supp [file elife-60669-supp-v1.zip]

**a** BAM:YEG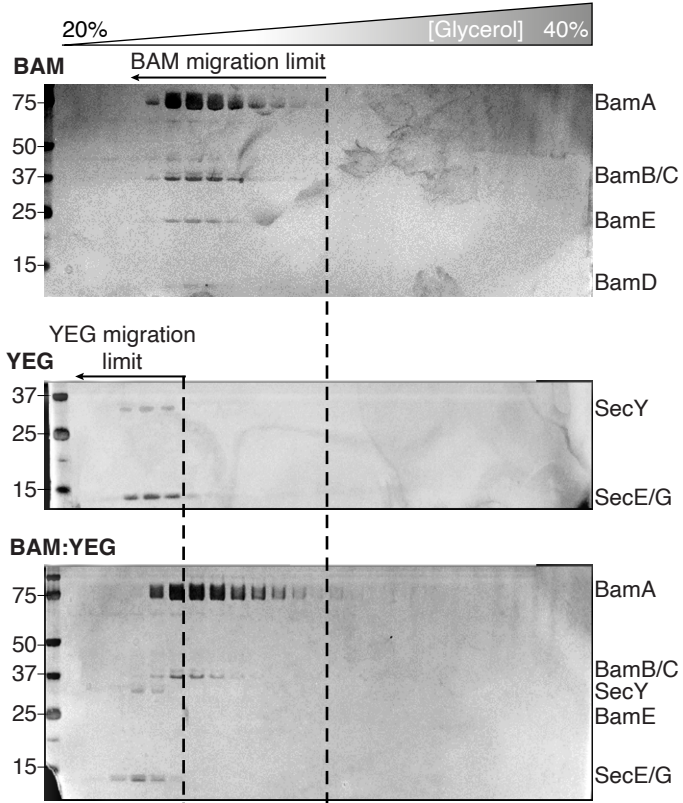**b** BAM:SecDF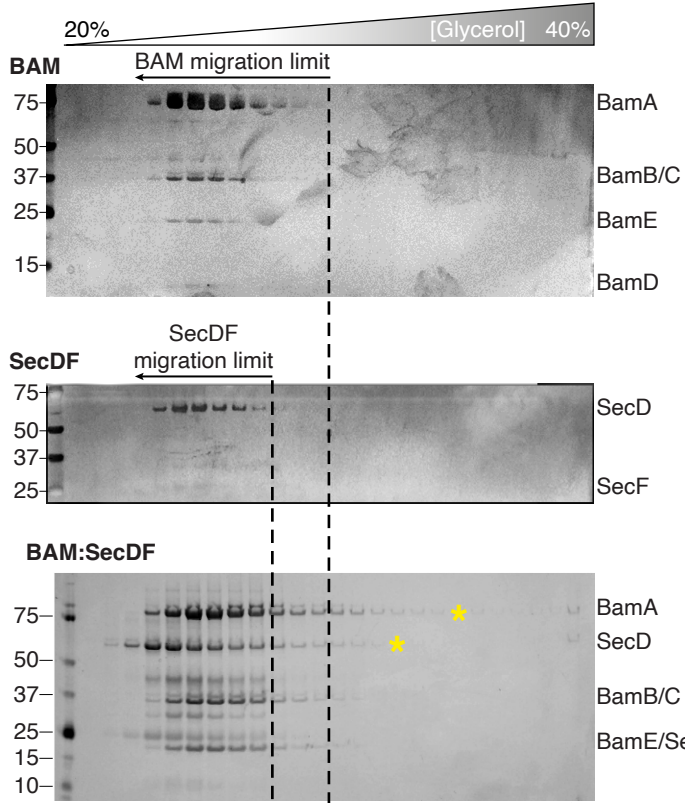**c** BAM:YidC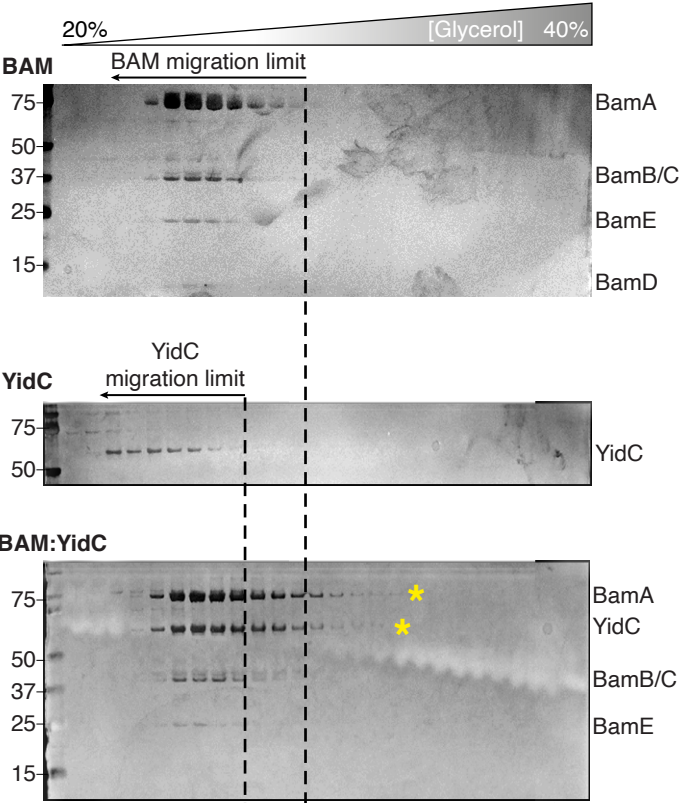

Supplement: supp [file elife-60669-supp-v1.zip]

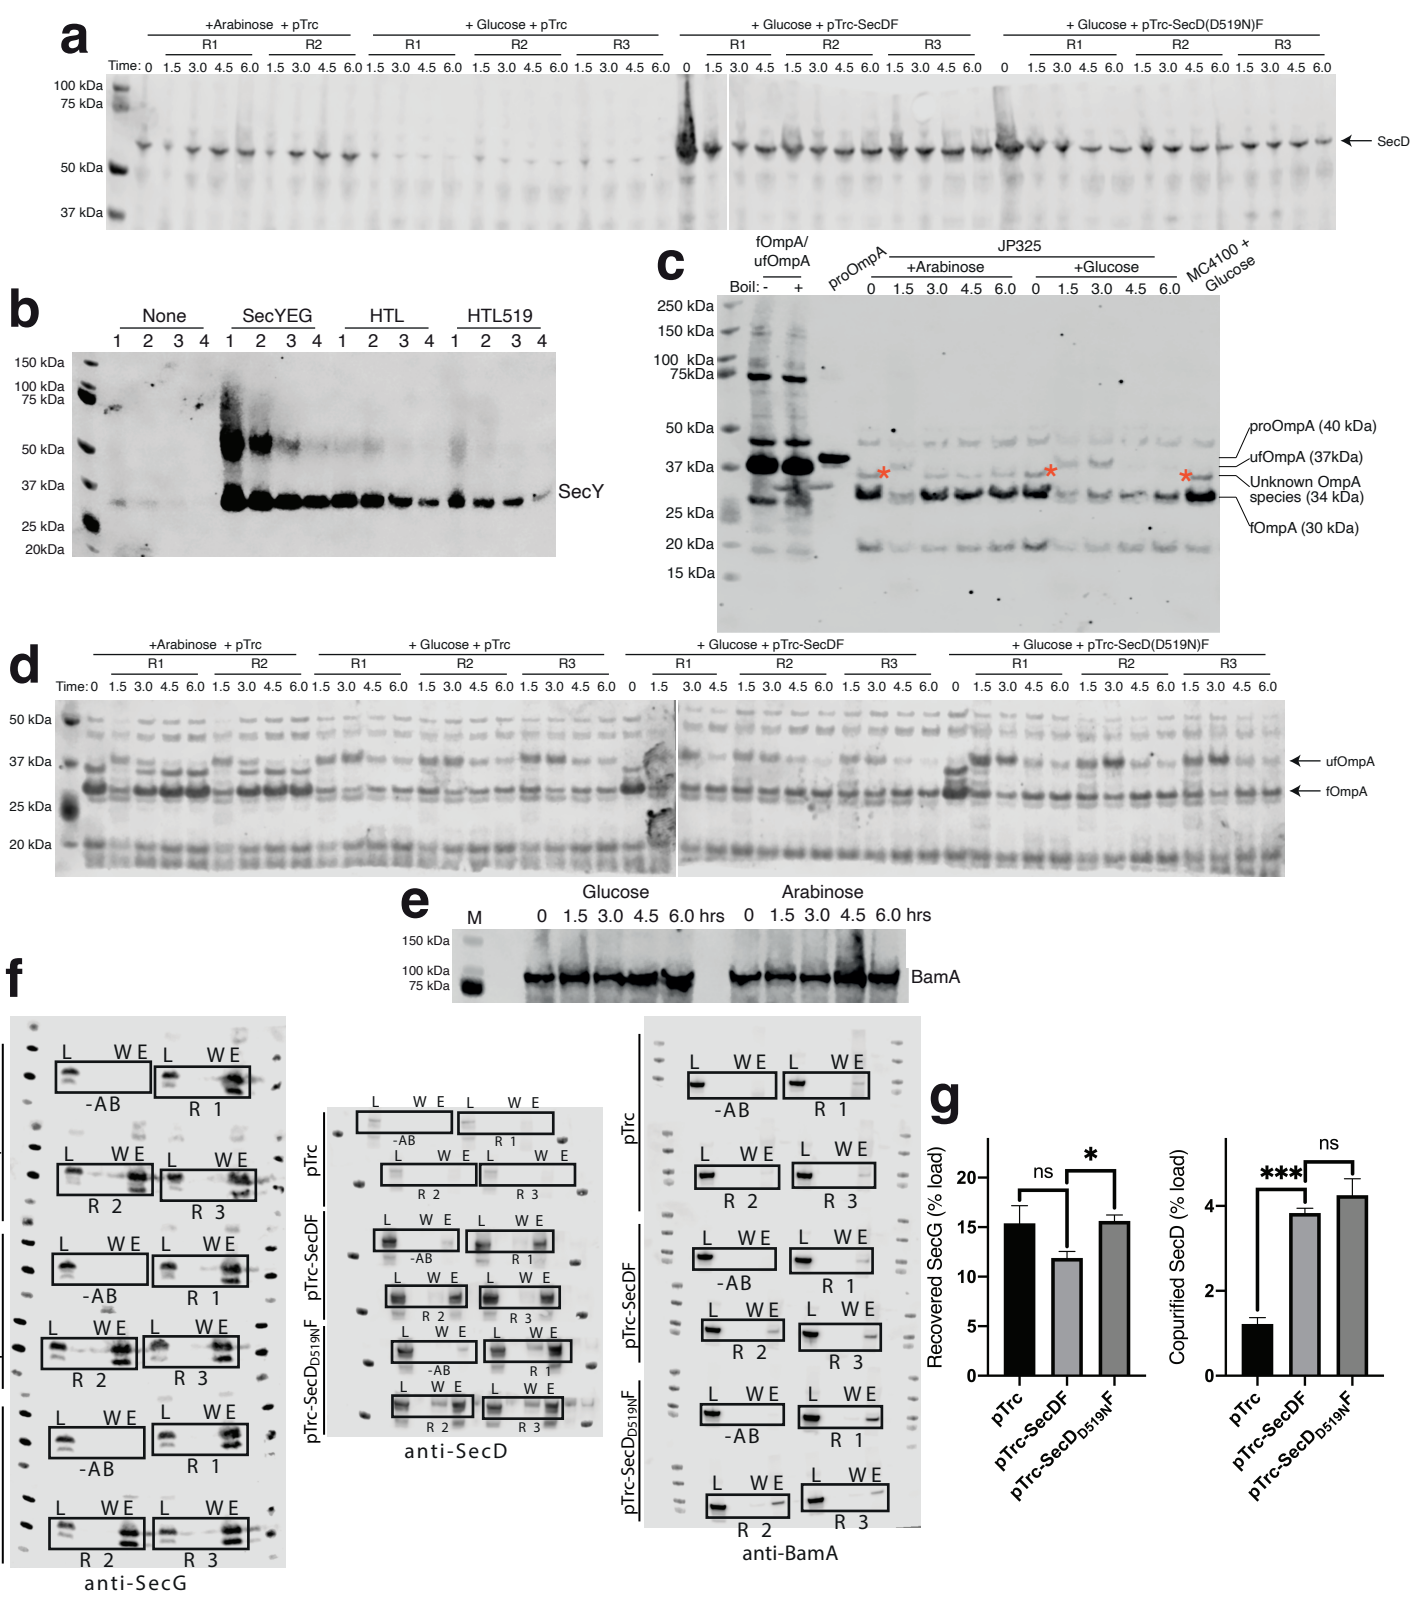

Supplement: supp [file elife-60669-supp-v1.zip]

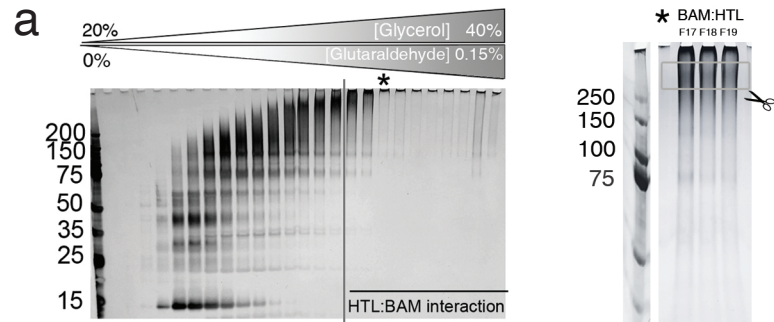

**b**

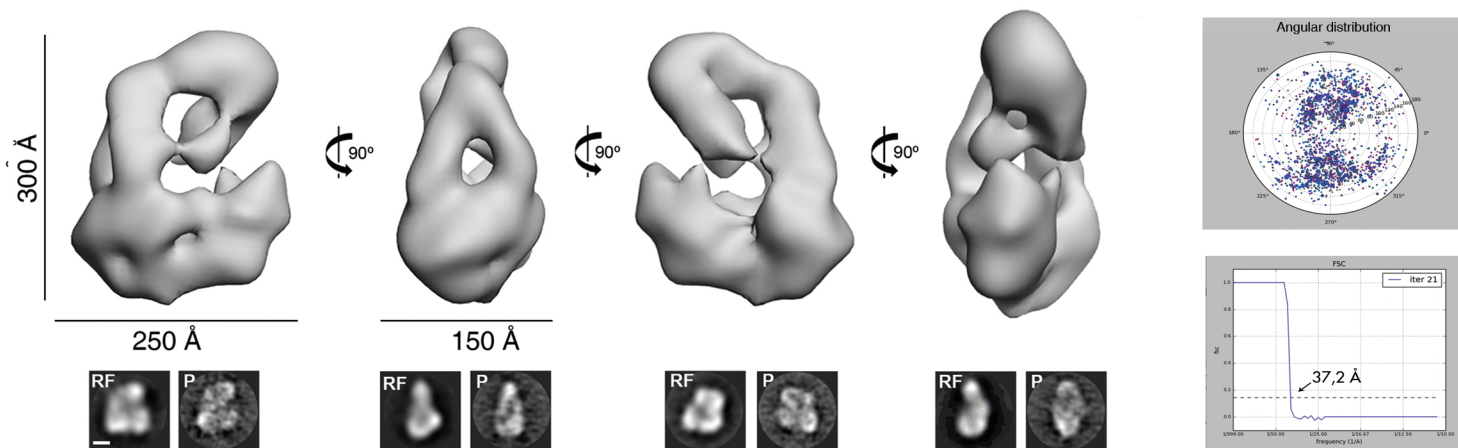

**c**

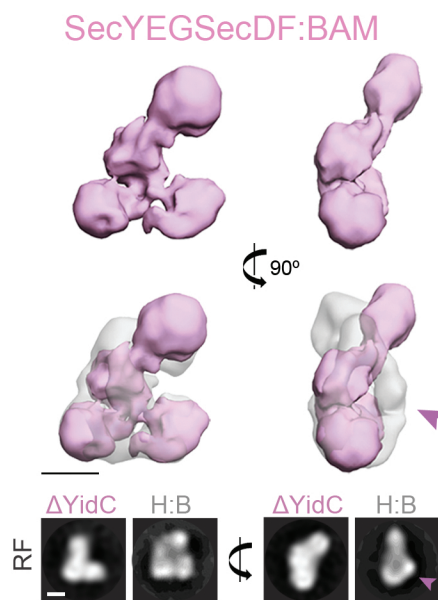

**d**

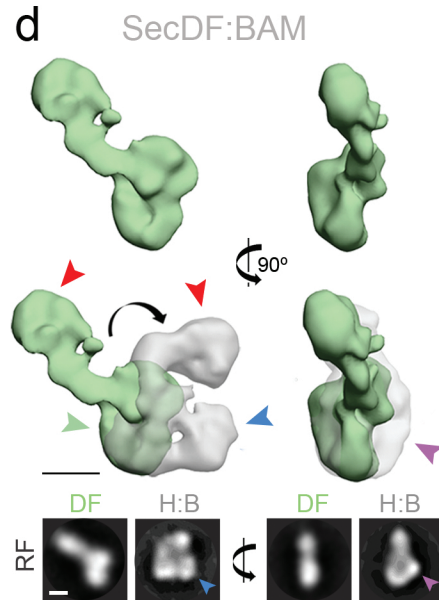

**e**

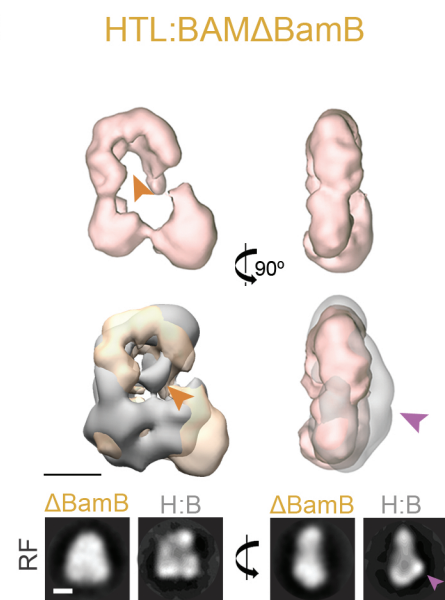

Supplement: supp [file elife-60669-supp-v1.zip]
